# Supplementary material
Source: Springer Nature journal article supplement (https://www.springermedizin.de/resource/supplementary/13013_2009_305_MOESM15_ESM.pdf/9631610)

C1

C2

**Clinical Criteria**

- Pelvis Centred
- Trunk Balanced
- Noticeable rib hump with lumbar spine rectilinear

**Clinical Criteria**

- Pelvis Centred
- Trunk Balanced
- Noticeable rib hump combined with a noticeable lumbar prominence

**Radiological Criteria**

- Single thoracic with no lumbar curve
- TP on the CSL
- T1 on the CSL

**Radiological Criteria**

- Thoracic major and lumbar minor or double thoracic and lumbar (false double)
- TP on the CSL
- T1 on the CSL
- Negative L5-4 counter-tilting

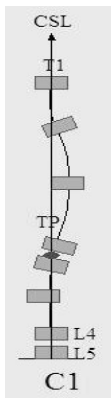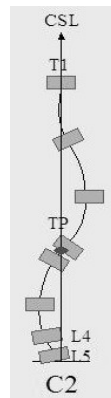**Brace Design**

- Neutral pelvis

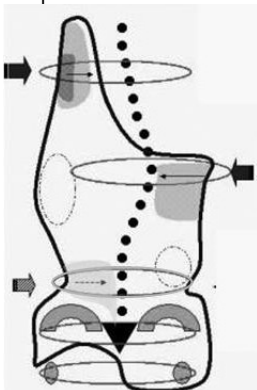**Brace Design**

- Neutral pelvis

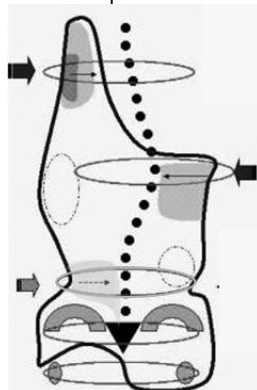

Supplement: MOESM15 [file 9631610]
